# Supplementary material
Source: PubMed Central journal article supplement (PMC3488837)
Supplement: 97320630008943S1.pdf [file 97320630008943S1.pdf]

## Supplementary material:

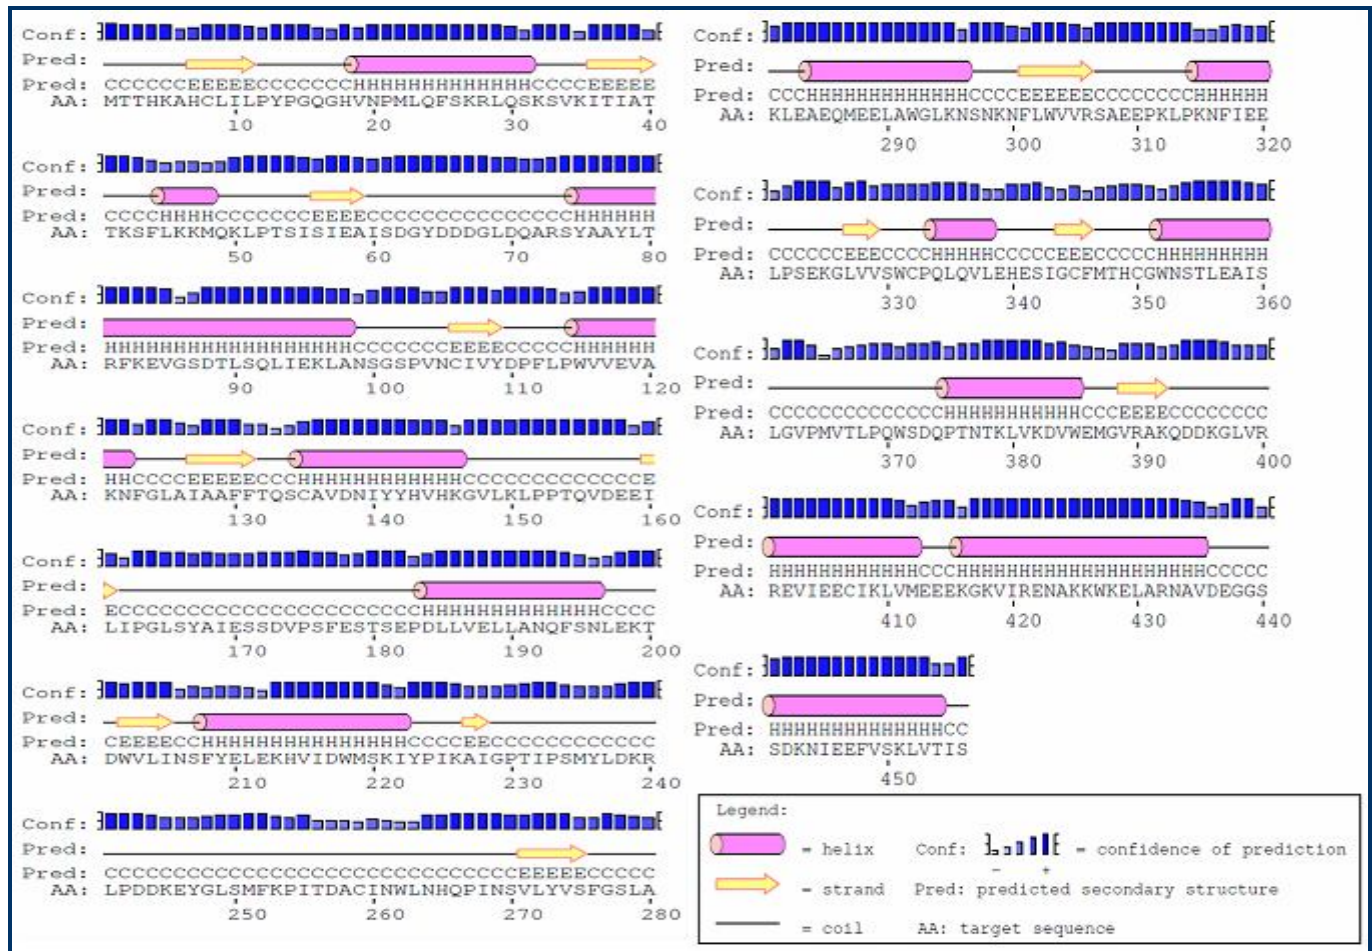

Figure S1: Predicted secondary structure of WsFGT protein

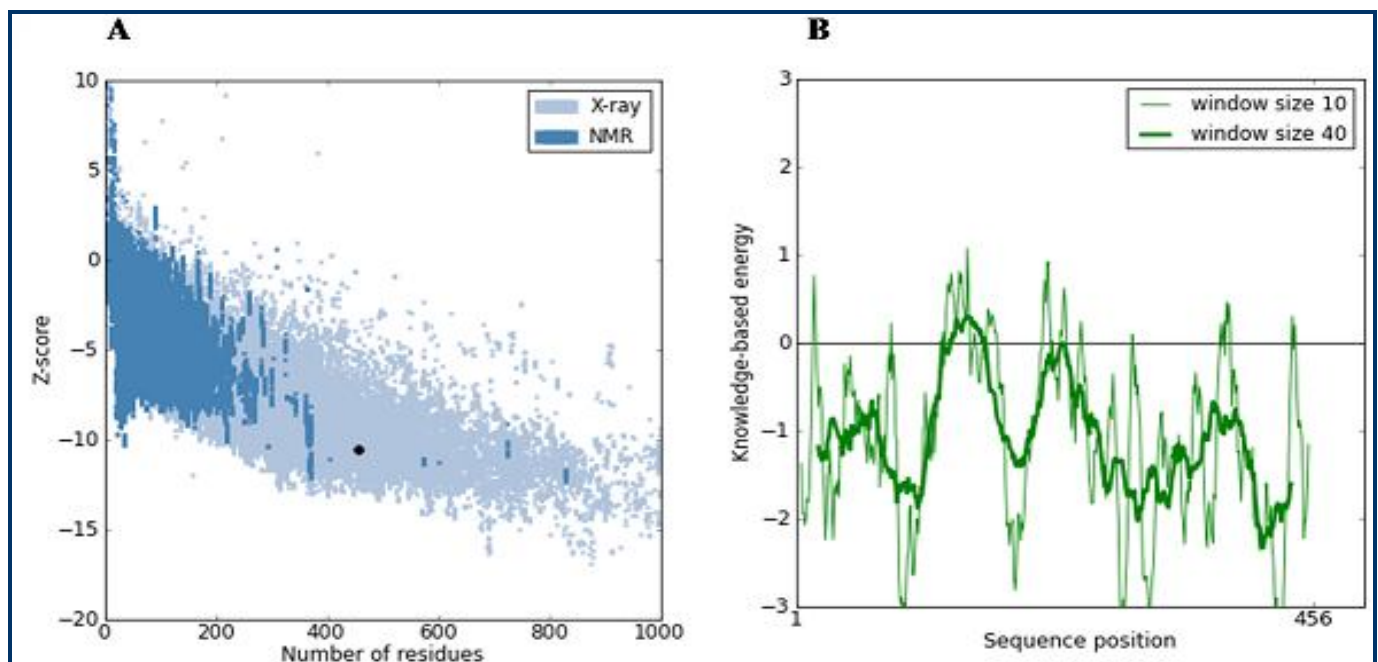

Figure S2: (A) The plan of Z-Score shows spot of Z score's value of protein determined by NMR (represented in dark blue colour) and by X-ray (represented in light blue colour) using ProSAIL program. The black dot represents Z-Score of the model; (B) Energy plot obtained from ProSAIL.

**Table 1:** Ramachandran plot statistics for 3D model of WsFGT

| Residues in quadrangles                  | Scattered residues |            |
|------------------------------------------|--------------------|------------|
|                                          | Number             | Percentage |
| Most favoured regions [A, B, L]          | 373                | 91.6       |
| Additional allowed regions [a,b,l,p]     | 34                 | 8.4        |
| Generously allowed regions [~a,~b,~l,~p] | 0                  | 0.0        |
| Disallowed regions [XX]                  | 0                  | 0.0        |
| Non-glycine and non-proline residues     | 407                | 100        |

**Table 2:** Tm scores and RMSD values of WsFGT models

| PDB Template                         | Tm Score | RMSD    |
|--------------------------------------|----------|---------|
| 2PQ6 ( <i>Medicago truncatula</i> )  | 0.90902  | 0.916 Å |
| 2C1Z ( <i>Vitis vinifera</i> )       | 0.92189  | 0.970 Å |
| 3HBJ ( <i>M. truncatula</i> )        | 0.91289  | 0.986 Å |
| 2ACW ( <i>M. truncatula</i> )        | 0.89778  | 1.006 Å |
| 2VG8 ( <i>Arabidopsis thaliana</i> ) | 0.88744  | 1.074 Å |

**Table 3:** Docking statistics of WsFGT with substrates

| Substrate   | Interaction energy kcal/mol | No of Hydrogen bonds | Hydrogen bond length Å | Amino acid residues                                                                     |
|-------------|-----------------------------|----------------------|------------------------|-----------------------------------------------------------------------------------------|
| UDP-Glucose | -10.9                       | 12                   | 2.1 - 3.4              | His18, Asn20, Gln133, Lys245, Ser278, Gln334, His349, Asn353, Ser354, Glu357 and Trp371 |
| Luteolin    | -9.3                        | 7                    | 2.1 - 3.1              | Tyr13, His18, Gln133, His349, Trp352 and Asn353                                         |
| Apigenin    | -9.2                        | 7                    | 2.1 - 3.4              | Tyr13, His18, Gln133, His349, Trp352 and Asn353                                         |
| Naringenin  | -9.2                        | 6                    | 1.7 - 2.5              | Tyr13, His18, Trp352, Asn353 and His349                                                 |
| Kaempferol  | -9.2                        | 8                    | 2.5 - 3.3              | Tyr13, His18, Gln133, His349, Trp352, Asn353 and Trp371                                 |
| Diadzein    | -8.4                        | 5                    | 2.2 - 3.3              | Ser278, Ser354, 357 and Trp371                                                          |
| Genistein   | -8.4                        | 5                    | 2.3 - 3.2              | Trp352, Asn353, Glu357 and Trp371                                                       |
